# Supplementary material for: Association of TET3 epigenetic inactivation with head and neck cancer
Source: PubMed Central journal article supplement (PMC5966249; doi:10.18632/oncotarget.25333), 2018-05-11
Supplement: oncotarget-09-24480-s001.pdf [file oncotarget-09-24480-s001.pdf]

## Association of *TET3* epigenetic inactivation with head and neck cancer

### SUPPLEMENTARY MATERIALS

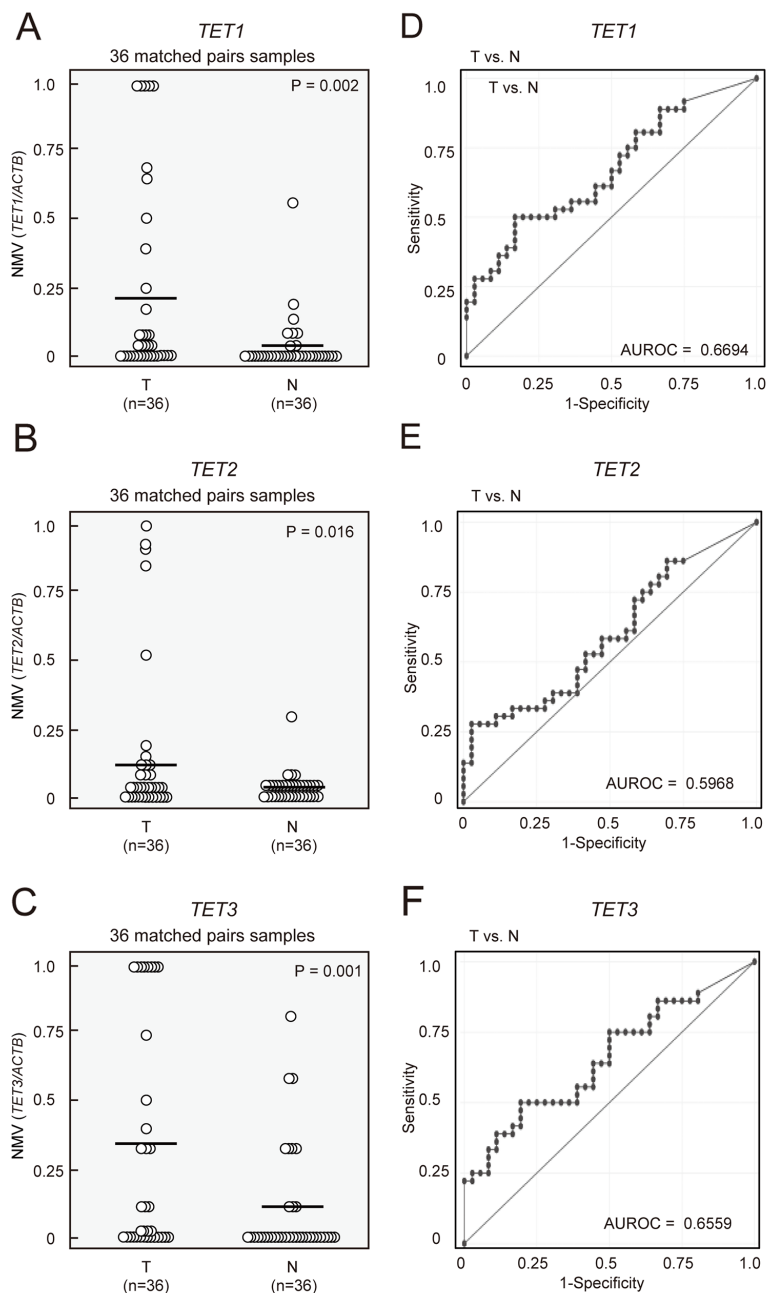

**Supplementary Figure 1: Hypermethylation patterns in 36 matched pairs of head and neck tumors and adjacent normal mucosal tissues.** *TET* methylation status in 36 matched pairs of head and neck tumor and normal tissue samples. The normalized methylation values (NMVs) for the (A) *TET1*, (B) *TET2*, and (C) *TET3* promoters were significantly higher in head and neck tumor tissues (T) than in paired adjacent normal mucosal tissue (N) (P = 0.002, 0.016 and 0.001, respectively). (D) The area under the ROC curve (AUROC) value for the *TET1* gene was 0.6694. At the cutoff value of 0.0471, the sensitivity was 50.0% and the specificity was 83.3%. (E) The AUROC value for the *TET2* gene was 0.5968. At the cutoff value of 0.1004, the sensitivity was 27.8% and the specificity was 97.2%. (F) Based on the ROC curve analysis, the AUROC value, sensitivity, specificity, and cutoff were 0.6559, 50.0%, 80.6%, and 0.1337, respectively, for *TET3*.

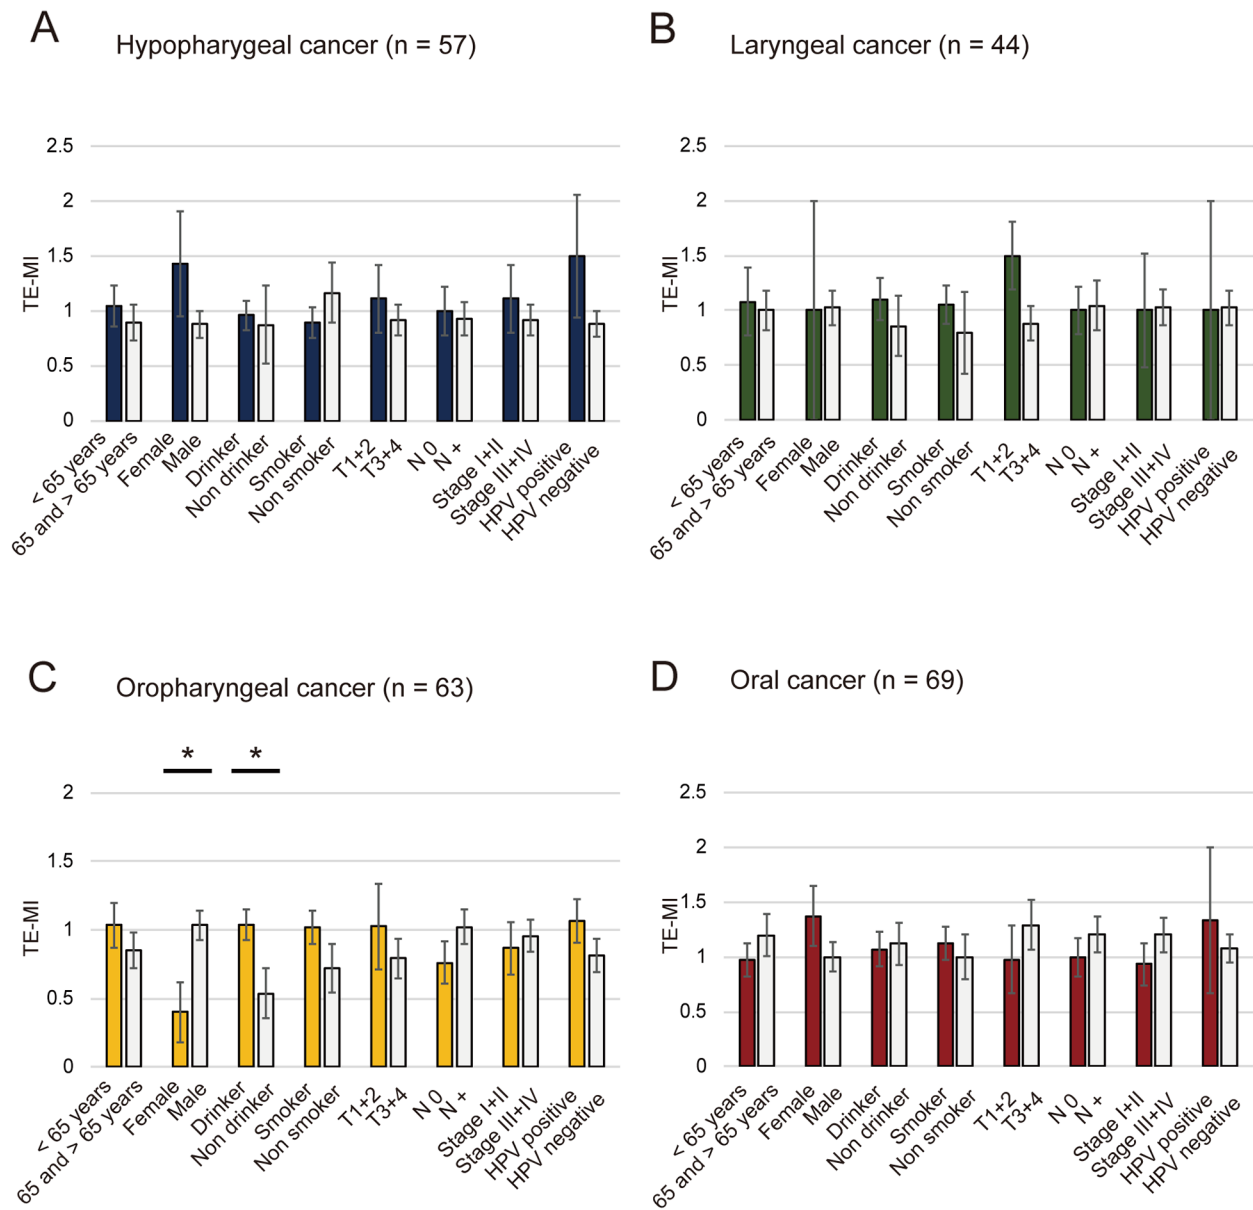

**Supplementary Figure 2: Association between TE-MI and the selected clinical parameters.** The mean TE-MI for the various groups was compared using Student's *t*-test. For associations between TE-MI and selected epidemiologic and clinical characteristics: **(A)** hypopharyngeal cancer, no differences were noted with regard to any of the clinical characteristics; **(B)** laryngeal cancer, no differences were noted with regard to any of the clinical characteristics; **(C)** oropharyngeal cancer, statistically significant differences were found for the associations between TE-MI and gender and alcohol consumption; **(D)** oral cavity cancer, no differences were noted with regard to any of the clinical characteristics. Mean and standard deviation are also indicated, and statistical comparisons between groups are depicted. \**P* < 0.05 was considered to represent a statistically significant difference.

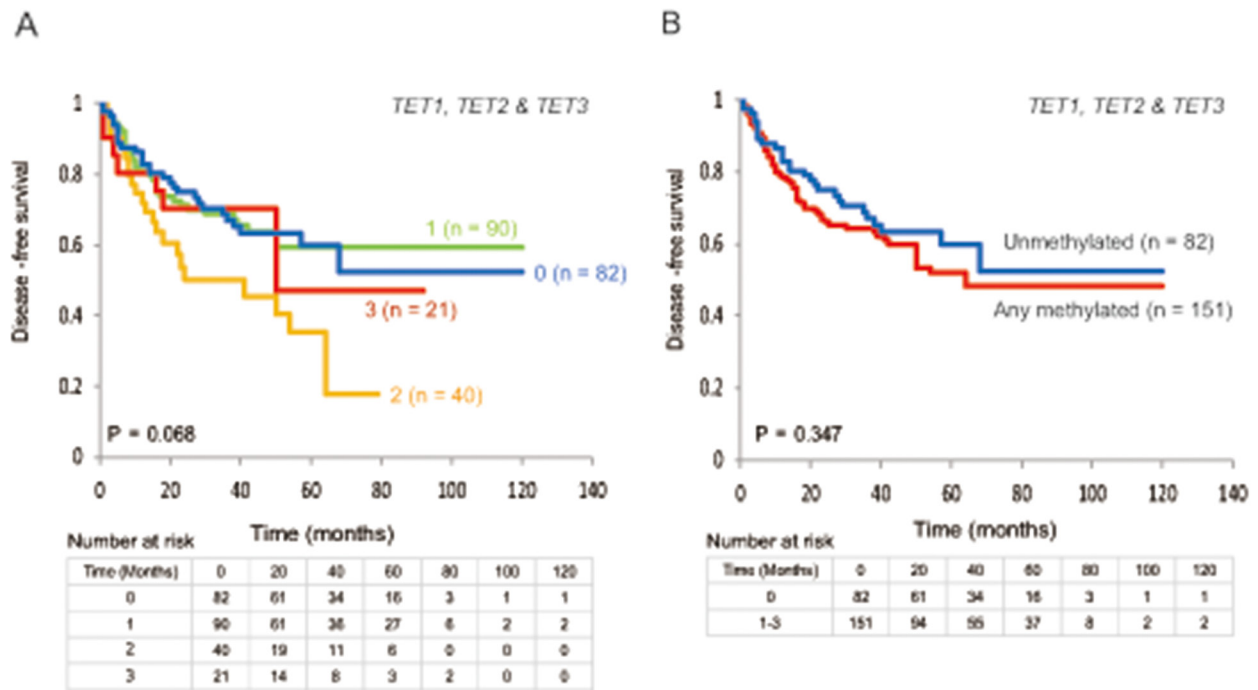

**Supplementary Figure 3: Kaplan–Meier survival curves for patients with HNSCC according to *TET1*, *TET2* and *TET3* methylation status. (A) Joint analysis of the 3 genes (n = 233; P = 0.068). (B) Methylation of any the *TET* promoters versus no methylation of all three *TET* promoters (P = 0.347).**

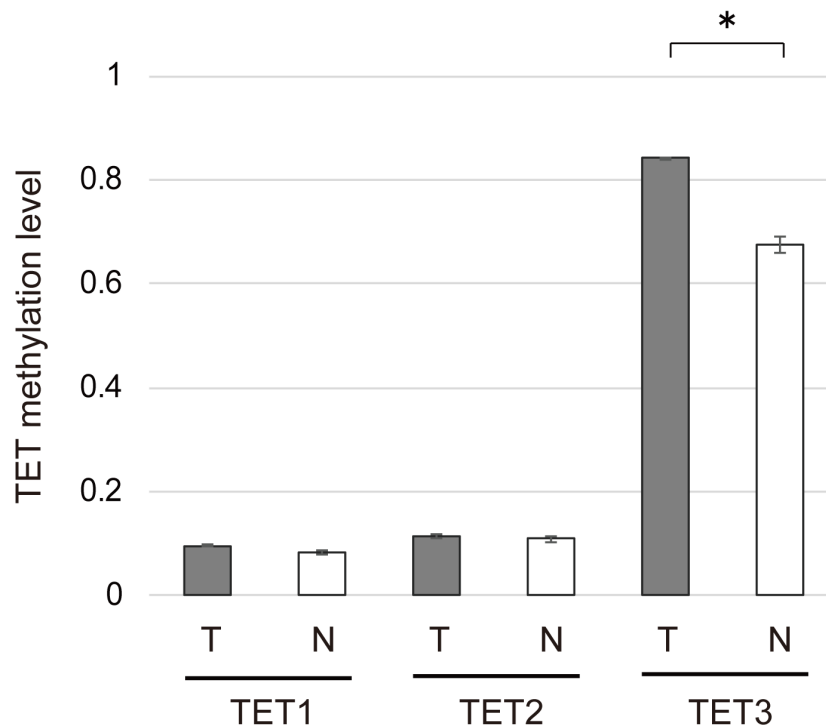

**Supplementary Figure 4: DNA methylation data from the TCGA database.** The DNA methylation data for *TET1*, *TET2* and *TET3* in HNSCC cancer were collected from the TCGA data portal (<https://tcga-data.nci.nih.gov/tcga/>) in November 2017.

**Supplementary Table 1: *TET1*, *TET2* and *TET3* gene methylation status in tumor and normal mucosal tissues**

| Patient and tumor characteristics | Methylation status |               |                              |             |               |                              |             |               |                              |
|-----------------------------------|--------------------|---------------|------------------------------|-------------|---------------|------------------------------|-------------|---------------|------------------------------|
|                                   | <i>TET1</i>        |               |                              | <i>TET2</i> |               |                              | <i>TET3</i> |               |                              |
|                                   | methylation        | unmethylation | <i>P</i> -value <sup>a</sup> | methylation | unmethylation | <i>P</i> -value <sup>a</sup> | methylation | unmethylation | <i>P</i> -value <sup>a</sup> |
| Tumor (233)                       | 137                | 96            | < 0.001                      | 31          | 202           | 1                            | 65          | 168           | < 0.001                      |
| Normal (128)                      | 48                 | 80            |                              | 19          | 109           |                              | 10          | 118           |                              |

<sup>a</sup>Fisher's exact probability test. \**P* < 0.05.

**Supplementary Table 2: Real time PCR primer list**

| QRT/QMSP | Gene | Forward/<br>Reverse   | Sequence                     | Length (bp) |
|----------|------|-----------------------|------------------------------|-------------|
| QRT      | TET1 | F                     | CCCTTGAAATGCCATAGGAA         | 81          |
|          |      | R                     | GAGAGCCTGCTGGAAGTGTG         |             |
|          | TET2 | F                     | GGCTGTTGGCCAGAGACTTA         | 117         |
|          |      | R                     | ATACCTGTAGGTGTTTGCCTGTTTA    |             |
|          | TET3 | F                     | GCCAACTTCAACATACCCTGGAC      | 81          |
|          |      | R                     | CACCTGGATGTGGGACTGTGTAA      |             |
| GAPDH    | F    | GCACCGTCAAGGCTGAGAAC  | 138                          |             |
|          | R    | TGGTGAAGACGCCAGTCTCTA |                              |             |
| QMSP     | TET1 | F                     | ATCGGCGCGAGTTGGAAAAGTT       | 103         |
|          |      | R                     | GACCCCAACTCACCGCTAACCG       |             |
|          | TET2 | F                     | CGCGGGTAACGGGATTTAAAG        | 123         |
|          |      | R                     | GTACCCTCGCTCTAACCCCG         |             |
|          | TET3 | F                     | CGAGGGGGTGGAGATGGTCGAAAGAAAC | 108         |
|          |      | R                     | CGTACGACGATTAATACAAC         |             |
|          | ACTB | F                     | TGGTGATGGAGGAGGTTTAGTAAGT    | 133         |
|          |      | R                     | AACCAATAAAACCTACTCCTCCCTTAA  |             |
